# Supplementary material for: Inter-Specific Genetic Exchange Despite Strong Divergence in Deep-Sea Hydrothermal Vent Gastropods of the Genus Alviniconcha
Source: MDPI journal article supplement (doi:10.3390/genes13060985), 2022-05-31
Supplement: s1 [file s1]

# Supplementary Material:

**Table S1.** Specimens used for each genetic analysis. Details are also available from NCBI Biosamples SAMN22059315-SAMN22060075 and SAMN22155691-SAMN22155716.

| Sample   | Site       | Field | Basin | Habitat      | <i>A. kojimai</i> | <i>A. boucheti</i> | <i>A. strummeri</i> | Not identified | Longitude      | Latitude      | depth (m) | Date | Analysis             |
|----------|------------|-------|-------|--------------|-------------------|--------------------|---------------------|----------------|----------------|---------------|-----------|------|----------------------|
| 721-GBT1 | Tow Cam    |       | Lau   | diffuse zone | 33                |                    | 1                   |                | 176°08'15,4" W | 20°19'04,4" S | 2716      | 2019 | COI/ddRAD/morphology |
| 721-GBT6 | Tow Cam    |       | Lau   | diffuse zone | 44                | 5                  |                     |                | 176°08'15,8" W | 20°19'05,1" S | 2711      | 2019 | COI/ddRAD/morphology |
| 721-GBT7 | Tow Cam    |       | Lau   | chimney      |                   | 20                 |                     |                | 176°08'12,7" W | 20°18'59,2" S | 2714      | 2019 | COI/ddRAD/morphology |
|          | Tow Cam    |       | Lau   | diffuse zone |                   | 2                  |                     |                |                |               | 2715      | 2009 | COI/RNAseq           |
| 722-GBT7 | Tui Malila |       | Lau   | diffuse zone | 31                |                    | 5                   |                | 176°34'04,2" W | 21°59'15,2" S | 1899      | 2019 | COI/ddRAD/morphology |
| 722-GBT1 | Tui Malila |       | Lau   | diffuse zone | 33                |                    | 19                  | 3              | 176°34'05,9" W | 21°59'21,2" S | 1886      | 2019 | COI/ddRAD/morphology |
| 722-GBT5 | Tui Malila |       | Lau   | diffuse zone | 32                |                    | 15                  |                | 176°34'05,5" W | 21°59'21,4" S | 1884      | 2019 | COI/ddRAD/morphology |

|          |            |           |            |              |    |    |   |   |                |               |      |      |                      |
|----------|------------|-----------|------------|--------------|----|----|---|---|----------------|---------------|------|------|----------------------|
|          | Tui Malila |           | Lau        | diffuse zone | 2  | 2  |   |   |                |               | 1885 | 2009 | COI/RNAseq           |
| 731-GBT3 | ABE        |           | Lau        | chimney      | 2  | 26 | 1 | 1 | 176°11'28,9" W | 20°45'47,1" S | 2149 | 2019 | COI/ddRAD/morphology |
|          | ABE        |           | Lau        | diffuse zone |    | 1  |   |   |                |               | 2145 | 2009 | COI/RNAseq           |
| 726-GBT4 | Mangatolo  |           | Lau        | diffuse zone |    | 26 |   |   | 174°39'12,7" W | 15°24'52,8" S | 2031 | 2019 | COI/ddRAD/morphology |
| 726-GBT3 | Mangatolo  |           | Lau        | chimney      |    | 4  |   |   | 174°39'12,5" W | 15°24'52,7" S | 2031 | 2019 | COI/ddRAD/morphology |
| 726-PBT6 | Mangatolo  |           | Lau        | diffuse zone | 18 |    |   |   | 174°39'19,9" W | 15°24'57,7" S | 2039 | 2019 | COI/ddRAD/morphology |
| 726-GBT2 | Mangatolo  |           | Lau        | diffuse zone | 3  |    |   |   | 174°39'12,6" W | 15°24'52,5" S | 2031 | 2019 | COI/ddRAD/morphology |
| 724-GBT4 | Phoenix    |           | North Fiji | diffuse zone | 39 |    |   |   | 173°55'7,6" E  | 16°57'0,0" S  | 1961 | 2019 | COI/ddRAD/morphology |
| 724-PBT4 | Phoenix    |           | North Fiji | diffuse zone | 33 |    | 9 |   | 173°55'4,7" E  | 16°56'57,8" S | 1973 | 2019 | COI/ddRAD/morphology |
| 727-GBT2 | AsterX     | Fatu Kapa | Futuna     | diffuse zone | 26 |    |   |   | 177°09'07,9" W | 14°45'06,5" S | 1562 | 2019 | COI/ddRAD/morphology |
| 727-GBT4 | Stephanie  | Fatu Kapa | Futuna     | chimney      | 16 |    | 1 |   | 177°09'57,6" W | 14°44'14,7" S | 1547 | 2019 | COI/ddRAD/morphology |

|           |          |          |        |                 |    |    |   |   |                |               |      |      |                          |
|-----------|----------|----------|--------|-----------------|----|----|---|---|----------------|---------------|------|------|--------------------------|
| 728-GBT2  |          | Fati Ufu | Futuna | chimney         | 27 |    | 3 | 2 | 177°11'07,0" W | 14°45'35,8" S | 1519 | 2019 | COI/ddRAD/<br>morphology |
| 728-PBT4  |          | Fati Ufu | Futuna | diffuse<br>zone | 40 |    | 1 |   | 177°11'04,9" W | 14°45'35,3" S | 1519 | 2019 | COI/ddRAD/<br>morphology |
| 728-GBT6  |          | Fati Ufu | Futuna | chimney         | 3  | 4  |   |   | 177°11'05,9" W | 14°45'35,2" S | 1518 | 2019 | COI/ddRAD/<br>morphology |
| 733-GBT2  | Big Papi | Pacmanus | Manus  | chimney         |    | 24 |   |   | 151°40'20,1" E | 3°43'43,9" S  | 1708 | 2019 | COI/ddRAD/<br>morphology |
| 733-GBT8  | Fenway   | Pacmanus | Manus  | diffuse<br>zone |    | 24 |   |   | 151°40'22,4" E | 3°43'41,2" S  | 1696 | 2019 | COI/ddRAD/<br>morphology |
| 733-GBT9  | Solwara8 | Pacmanus | Manus  | chimney         |    | 13 |   |   | 151°40'27,5" E | 3°43'49,3" S  | 1737 | 2019 | COI/ddRAD/<br>morphology |
| 733-PBT7  | Solwara8 | Pacmanus | Manus  | chimney         |    | 5  |   |   | 151°40'26,6" E | 3°43'50,1" S  | 1734 | 2019 | COI/ddRAD/<br>morphology |
| 734-GBT9  |          | Pacmanus | Manus  | chimney         |    | 28 |   |   | 152°6'2,8" E   | 3°43'17,2" S  | 1659 | 2019 | COI/ddRAD/<br>morphology |
| 736-GBT3  | Solwara1 | Susu     | Manus  | chimney         | 24 |    |   |   | 152°5'47,0" E  | 3°47'22,1" S  | 1505 | 2019 | COI/ddRAD/<br>morphology |
| 736-GBT10 | North Su | Susu     | Manus  | diffuse<br>zone | 22 |    |   |   | 152°6'2,8" E   | 3°47'56,0" S  | 1218 | 2019 | COI/ddRAD/<br>morphology |
| 737-GBT10 | South Su | Susu     | Manus  | diffuse<br>zone |    | 24 |   |   | 152°6'18,6" E  | 3°48'35,0" S  | 1353 | 2019 | COI/ddRAD/<br>morphology |

|           |          |      |              |                 |    |    |  |                |              |      |      |                          |
|-----------|----------|------|--------------|-----------------|----|----|--|----------------|--------------|------|------|--------------------------|
| 737-PBT5  | South Su | Susu | Manus        | chimney         | 17 | 13 |  | 152°6'17,5" E  | 3°48'29,8" S | 1300 | 2019 | COI/ddRAD/<br>morphology |
| 737-GBT7  | South Su | Susu | Manus        | diffuse<br>zone |    | 24 |  | 152°6'17,9" E  | 3°48'31,8" S | 1343 | 2019 | COI/ddRAD/<br>morphology |
| 738-GBT10 | Scala    |      | Woodla<br>rk | chimney         | 24 |    |  | 155°03'09,6" E | 9°47'56,7" S | 3388 | 2019 | COI/ddRAD/<br>morphology |
| 739-GBT10 | Scala    |      | Woodla<br>rk | chimney         | 24 |    |  | 155°03'07,0' E | 9°47'56,3' S | 3344 | 2019 | COI/ddRAD/<br>morphology |
| 739-PBT5  | Scala    |      | Woodla<br>rk | chimney         |    | 24 |  | 155°03'08,1" E | 9°47'56,0" S | 3353 | 2019 | COI/ddRAD/<br>morphology |

---

**Table S2.** Pairwise genetic differentiation (estimated by  $F_{ST}$ ) between populations of each species. a) For *A. boucheti*, b) For *A. strummeri* and c) For *A. kojimai*.

| a)             | Lau Basin | Futuna arc | Manus Basin |
|----------------|-----------|------------|-------------|
| Lau basin      | -         | -          | -           |
| Futuna         | 0         | -          | -           |
| Manus basin    | 0.002     | 0.003      | -           |
| Woodlark basin | 0.003     | 0.003      | 0           |

| b)         | Lau Basin | Futuna arc |
|------------|-----------|------------|
| Lau basin  | -         | -          |
| Futuna     | 0         | -          |
| Fiji basin | 0.022     | 0.021      |

| c)             | Lau Basin | Futuna arc | Fiji Basin | Manus Basin |
|----------------|-----------|------------|------------|-------------|
| Lau basin      | -         | -          | -          | -           |
| Futuna         | 0         | -          | -          | -           |
| Fiji basin     | 0.004     | 0.004      | -          | -           |
| Manus basin    | 0.011     | 0.011      | 0.008      | -           |
| Woodlark basin | 0.011     | 0.010      | 0.008      | 0           |

**Table S3.** Likelihood of demographic models in the hierarchical comparison of alternate models in DILS. The probability (P.) of ongoing migration is the likelihood of current migration vs. current isolation. P. SC gives the support for secondary contact against isolation with migration (within the context of ongoing migration). The probability (P.) of ongoing isolation is the likelihood of current isolation vs. current migration. P. AM gives support for ancient migration against strict isolation (within the context of ongoing isolation). The last four columns give the likelihood of heterogeneous/ homogeneous effective population size and migration across loci along the genome.

| Species 1          | Species 2         | P. Ongoing migration | P. Ongoing isolation | P. SC | P. AM | P. N-heterogeneous | P. N-homogeneous | P. M-heterogeneous | P. M-homogeneous |
|--------------------|-------------------|----------------------|----------------------|-------|-------|--------------------|------------------|--------------------|------------------|
| <i>A. boucheti</i> | <i>A. kojimai</i> | 0.93                 |                      | 0.95  |       | 0.65               |                  | 0.42               |                  |
| <i>A. boucheti</i> | <i>A. kojimai</i> | 0.87                 |                      | 0.96  |       |                    | 0.57             | 0.60               |                  |
| <i>A. boucheti</i> | <i>A. kojimai</i> | 0.95                 |                      | 0.95  |       | 0.56               |                  |                    | 0.51             |
| <i>A. boucheti</i> | <i>A. kojimai</i> | 0.94                 |                      | 0.96  |       | 0.59               |                  | 0.46               |                  |
| <i>A. boucheti</i> | <i>A. kojimai</i> | 0.94                 |                      | 0.91  |       | 0.58               |                  | 0.45               |                  |
| <i>A. boucheti</i> | <i>A. kojimai</i> | 0.96                 |                      | 0.95  |       | 0.65               |                  |                    | 0.54             |
| <i>A. boucheti</i> | <i>A. kojimai</i> | 0.87                 |                      | 0.95  |       | 0.63               |                  |                    | 0.60             |

|                    |                     |      |      |      |      |
|--------------------|---------------------|------|------|------|------|
| <i>A. boucheti</i> | <i>A. kojimai</i>   | 0.91 | 0.89 | 0.67 | 0.51 |
| <i>A. boucheti</i> | <i>A. kojimai</i>   | 0.94 | 0.93 | 0.79 | 0.47 |
| <i>A. boucheti</i> | <i>A. kojimai</i>   | 0.90 | 0.90 | 0.65 | 0.48 |
| <i>A. kojimai</i>  | <i>A. strumneri</i> | 0.97 | 0.87 | 0.70 | 0.62 |
| <i>A. kojimai</i>  | <i>A. strumneri</i> | 0.97 | 0.80 | 0.67 | 0.59 |
| <i>A. kojimai</i>  | <i>A. strumneri</i> | 0.98 | 0.90 | 0.84 | 0.65 |
| <i>A. kojimai</i>  | <i>A. strumneri</i> | 0.98 | 0.89 | 0.81 | 0.55 |
| <i>A. kojimai</i>  | <i>A. strumneri</i> | 0.97 | 0.88 | 0.79 | 0.51 |
| <i>A. kojimai</i>  | <i>A. strumneri</i> | 0.98 | 0.90 | 0.72 | 0.60 |
| <i>A. kojimai</i>  | <i>A. strumneri</i> | 0.97 | 0.88 | 0.71 | 0.64 |
| <i>A. kojimai</i>  | <i>A. strumneri</i> | 0.99 | 0.86 | 0.74 | 0.47 |
| <i>A. kojimai</i>  | <i>A. strumneri</i> | 0.98 | 0.78 | 0.77 | 0.52 |

|                    |                     |      |      |      |      |      |      |
|--------------------|---------------------|------|------|------|------|------|------|
| <i>A. kojimai</i>  | <i>A. strummeri</i> | 0.97 |      | 0.88 | 0.71 |      | 0.59 |
| <i>A. boucheti</i> | <i>A. strummeri</i> | 0.90 |      | 0.92 | 0.66 |      | 0.47 |
| <i>A. boucheti</i> | <i>A. strummeri</i> | 0.88 |      | 0.93 |      | 0.74 | 0.61 |
| <i>A. boucheti</i> | <i>A. strummeri</i> |      | 0.89 |      | 0.60 | 0.70 |      |
| <i>A. boucheti</i> | <i>A. strummeri</i> | 0.90 |      | 0.88 | 0.63 |      | 0.49 |
| <i>A. boucheti</i> | <i>A. strummeri</i> | 0.87 |      | 0.87 | 0.65 |      | 0.39 |
| <i>A. boucheti</i> | <i>A. strummeri</i> | 0.89 |      | 0.81 | 0.68 |      | 0.68 |
| <i>A. boucheti</i> | <i>A. strummeri</i> | 0.87 |      | 0.90 | 0.59 |      | 0.43 |
| <i>A. boucheti</i> | <i>A. strummeri</i> | 0.90 |      | 0.82 | 0.80 |      | 0.56 |
| <i>A. boucheti</i> | <i>A. strummeri</i> |      | 0.90 |      | 0.72 | 0.78 |      |
| <i>A. boucheti</i> | <i>A. strummeri</i> |      | 0.92 |      | 0.65 | 0.81 |      |



**Table S4.** Demographic parameters estimates under the Secondary Contact model.  $N_1$  and  $N_2$ : effective size of population 1 and 2;  $N_a$ : effective size of the ancestral population;  $N_{f1}$  and  $N_{f2}$ : effective size of population 1 and 2 after the split calculated by  $N_a \times \text{founders1}$  or  $N_a \times \text{founders2}$ ;  $\text{shape\_N\_1}$  and  $\text{shape\_N\_2}$ : shape parameter  $\alpha$  (resp.  $\beta$ ) of the Beta ( $\alpha, \beta$ ) distribution for  $N_e$ ;  $T_{\text{split}}$ : time of split at which the ancestral population subdivides in two populations (in generations);  $T_{\text{dem}}$ : time of the reduction of the effective size population;  $T_{\text{sc}}$ : time of secondary contact at which the two populations start exchanging genes (in generations);  $M_{12}$  and  $M_{21}$ : introgression rates from population 2 to 1 and from population 1 to 2, respectively (in number of migrants per generation); For each analysis performed, the index between brackets represents the species population.

| Species 1          | Species 2         | Euclidean distance | $N_a$   | $N_{f1}$ | $N_{f2}$ | $N_1$   | $N_2$   | Shape_<br>N_1 | Shape_<br>N_2 | $T_{\text{split}}$ | $T_{\text{dem1}}$ | $T_{\text{dem2}}$ | $T_{\text{sc}}$ | $T_{\text{sc}}/T_{\text{split}}$ | $T_{\text{am}}$ | $M_{12}$ | shape_<br>M12_a | shape_<br>M12_b | $M_{21}$ | shape_<br>M21_a | shape_<br>M21_b |
|--------------------|-------------------|--------------------|---------|----------|----------|---------|---------|---------------|---------------|--------------------|-------------------|-------------------|-----------------|----------------------------------|-----------------|----------|-----------------|-----------------|----------|-----------------|-----------------|
| <i>A. boucheti</i> | <i>A. kojimai</i> | 0.95               | 266 855 | 16 529   | 2 057    | 62 340  | 49 340  | 1.41          | 0.72          | 139 580            | 5 440             | 87 920            | 3 480           | 0.03                             |                 | 1.32     | 1.27            | 3.21            | 1.88     | 0.90            | 0.73            |
| <i>A. boucheti</i> | <i>A. kojimai</i> | 1.52               | 221 825 | 10 577   | 22 611   | 33 110  | 347 690 | 1.46          | 1.86          | 185 580            | 80 740            | 5 320             | 2 960           | 0.02                             |                 | 2.24     | 1.35            | 2.55            | 1.55     | 3.45            | 3.40            |
| <i>A. boucheti</i> | <i>A. kojimai</i> | 1.08               | 291 415 | 13 702   | 1 769    | 396 915 | 53 375  |               |               | 96 060             | 6 660             | 75 280            | 7 100           | 0.07                             |                 | 0.49     | 1.03            | 2.01            | 1.02     | 0.51            | 1.39            |
| <i>A. boucheti</i> | <i>A. kojimai</i> | 0.78               | 263 905 | 11 250   | 10 786   | 52 500  | 280 335 | 2.06          | 1.70          | 141 340            | 35 140            | 10 200            | 6 900           | 0.05                             |                 | 0.72     |                 |                 | 0.71     |                 |                 |
| <i>A. boucheti</i> | <i>A. kojimai</i> | 0.99               | 262 445 | 7 797    | 20 072   | 38 640  | 298 155 | 2.37          | 2.21          | 154 160            | 41 980            | 7 820             | 10 040          | 0.07                             |                 | 0.72     |                 |                 | 0.42     |                 |                 |

|                    |                     |      |         |        |        |         |         |      |      |         |         |         |        |      |  |      |      |      |      |      |      |
|--------------------|---------------------|------|---------|--------|--------|---------|---------|------|------|---------|---------|---------|--------|------|--|------|------|------|------|------|------|
| <i>A. boucheti</i> | <i>A. kojimai</i>   | 0.98 | 269 830 | 11 203 | 15 159 | 42 260  | 81 105  | 3.02 | 2.00 | 145 640 | 40 340  | 24 020  | 2 700  | 0.02 |  | 1.61 | 1.81 | 3.90 | 1.93 | 0.91 | 2.58 |
| <i>A. boucheti</i> | <i>A. kojimai</i>   | 1.21 | 237 620 | 11 301 | 1 138  | 37 105  | 39 755  | 2.79 | 3.98 | 156 620 | 50 300  | 144 420 | 2 340  | 0.02 |  | 2.00 | 4.66 | 2.82 | 1.91 | 1.49 | 2.07 |
| <i>A. boucheti</i> | <i>A. kojimai</i>   | 1.32 | 266 985 | 29 350 | 19 698 | 20 315  | 110 000 | 2.38 | 1.46 | 151 780 | 120 060 | 14 340  | 5 380  | 0.04 |  | 1.41 | 1.65 | 3.47 | 0.75 | 1.24 | 0.94 |
| <i>A. boucheti</i> | <i>A. kojimai</i>   | 1.32 | 238 975 | 12 111 | 19 347 | 33 020  | 90 130  | 1.93 | 2.49 | 172 500 | 31 940  | 23 560  | 2 680  | 0.02 |  | 1.82 | 3.23 | 0.94 | 2.52 | 1.39 | 3.08 |
| <i>A. boucheti</i> | <i>A. kojimai</i>   | 1.11 | 283 840 | 68 343 | 10 130 | 18 190  | 51 420  | 1.86 | 0.77 | 122 100 | 122 700 | 49 680  | 1 440  | 0.01 |  | 2.93 |      |      | 3.72 |      |      |
| <i>A. kojimai</i>  | <i>A. strumneri</i> | 0.78 | 130 795 | 11 040 | 4 816  | 103 615 | 61 535  | 1.55 | 2.74 | 126 720 | 22 620  | 69 980  | 10 320 | 0.08 |  | 0.36 | 1.62 | 1.89 | 4.18 | 4.04 | 2.14 |
| <i>A. kojimai</i>  | <i>A. strumneri</i> | 0.94 | 145 945 | 14 254 | 10 947 | 112 745 | 59 170  | 3.40 | 2.37 | 102 560 | 18 020  | 42 540  | 7 300  | 0.07 |  | 0.34 | 2.76 | 1.25 | 4.94 | 4.56 | 1.60 |
| <i>A. kojimai</i>  | <i>A. strumneri</i> | 0.92 | 115 855 | 14 612 | 4 124  | 52 910  | 46 635  | 1.49 | 3.21 | 143 220 | 35 460  | 103 940 | 7 940  | 0.06 |  | 0.48 | 4.39 | 1.15 | 5.15 | 3.28 | 2.79 |
| <i>A. kojimai</i>  | <i>A. strumneri</i> | 0.76 | 114 260 | 7 936  | 21 847 | 64 615  | 169 210 | 1.28 | 2.35 | 143 180 | 60 080  | 8 860   | 8 540  | 0.06 |  | 0.68 | 0.82 | 2.94 | 4.72 | 4.10 | 0.20 |
| <i>A. kojimai</i>  | <i>A. strumneri</i> | 1.03 | 118 035 | 5 361  | 10 031 | 83 595  | 108 870 | 1.61 | 4.05 | 106 720 | 33 340  | 36 180  | 5 700  | 0.05 |  | 1.22 | 2.92 | 0.96 | 5.57 | 5.05 | 1.00 |

|                    |                     |      |         |        |        |         |           |      |      |         |        |        |        |      |        |      |      |      |      |      |      |
|--------------------|---------------------|------|---------|--------|--------|---------|-----------|------|------|---------|--------|--------|--------|------|--------|------|------|------|------|------|------|
| <i>A. kojimai</i>  | <i>A. strummeri</i> | 0.78 | 127 500 | 11 676 | 12 719 | 53 885  | 67 510    | 2.25 | 4.69 | 125 280 | 49 580 | 42 680 | 8 480  | 0.07 |        | 0.48 | 0.76 | 1.50 | 4.74 | 4.27 | 3.60 |
| <i>A. kojimai</i>  | <i>A. strummeri</i> | 0.75 | 109 300 | 12 043 | 12 553 | 64 980  | 74 600    | 1.40 | 1.95 | 136 620 | 37 640 | 35 720 | 8 240  | 0.06 |        | 0.33 |      |      | 4.62 |      |      |
| <i>A. kojimai</i>  | <i>A. strummeri</i> | 0.81 | 124 230 | 6 130  | 17 370 | 54 150  | 104 685   | 1.83 | 3.48 | 124 080 | 67 360 | 15 460 | 10 660 | 0.09 |        | 0.36 | 2.25 | 3.35 | 3.86 | 4.23 | 1.07 |
| <i>A. kojimai</i>  | <i>A. strummeri</i> | 1.35 | 156 270 | 10 328 | 6 952  | 492 275 | 84 105    | 1.56 | 1.50 | 74 640  | 10 260 | 29 780 | 6 880  | 0.09 |        | 0.33 |      |      | 5.58 |      |      |
| <i>A. kojimai</i>  | <i>A. strummeri</i> | 0.72 | 131 210 | 12 654 | 7 038  | 82 960  | 57 115    | 1.55 | 4.70 | 133 200 | 25 740 | 55 500 | 12 000 | 0.09 |        | 0.37 |      |      | 4.08 |      |      |
| <i>A. boucheti</i> | <i>A. strummeri</i> | 1.31 | 195 030 | 13 428 | 30 349 | 36 935  | 32 095    | 3.45 | 0.26 | 158 020 | 38 220 | 62 500 |        |      | 82 760 | 1.91 | 2.55 | 5.12 | 3.14 | 3.17 | 2.91 |
| <i>A. boucheti</i> | <i>A. strummeri</i> | 1.16 | 157 765 | 10 731 | 12 132 | 54 930  | 25 145    | 1.73 | 3.17 | 113 160 | 24 360 | 39 520 | 2 060  | 0.02 |        | 1.24 |      |      | 3.75 |      |      |
| <i>A. boucheti</i> | <i>A. strummeri</i> | 1.53 | 182 395 | 16 649 | 21 539 | 546 525 | 1 010 655 | 4.48 | 2.27 | 140 740 | 7 660  | 20     |        |      | 63 980 | 2.11 |      |      | 3.33 |      |      |
| <i>A. boucheti</i> | <i>A. strummeri</i> | 1.21 | 151 795 | 10 821 | 15 923 | 46 850  | 26 230    | 2.37 | 1.27 | 112 820 | 23 820 | 41 560 | 2 960  | 0.03 |        | 0.56 | 2.72 | 1.04 | 2.63 | 2.33 | 0.98 |

|                    |                     |      |         |        |        |        |        |      |      |         |        |         |       |      |         |      |      |      |      |      |      |
|--------------------|---------------------|------|---------|--------|--------|--------|--------|------|------|---------|--------|---------|-------|------|---------|------|------|------|------|------|------|
| <i>A. boucheti</i> | <i>A. strummeri</i> | 1.29 | 181 940 | 10 338 | 69 598 | 44 435 | 16 660 |      |      | 70 920  | 15 720 | 73 960  | 2 260 | 0.03 |         | 0.93 | 1.59 | 2.52 | 2.11 | 1.75 | 1.85 |
| <i>A. boucheti</i> | <i>A. strummeri</i> | 1.23 | 231 740 | 17 420 | 18 963 | 27 395 | 28 245 | 4.22 | 2.16 | 232 520 | 62 080 | 88 860  |       |      | 104 420 | 4.14 |      |      | 3.11 |      |      |
| <i>A. boucheti</i> | <i>A. strummeri</i> | 1.01 | 167 975 | 1 925  | 12 828 | 36 065 | 22 980 | 1.65 | 0.67 | 91 580  | 74 900 | 47 720  | 2 320 | 0.03 |         | 0.68 |      |      | 2.77 |      |      |
| <i>A. boucheti</i> | <i>A. strummeri</i> | 1.01 | 163 150 | 2 842  | 30 770 | 39 650 | 15 625 | 2.14 | 3.88 | 107 360 | 85 360 | 104 780 | 2 760 | 0.03 |         | 0.50 | 4.66 | 3.89 | 2.44 | 1.16 | 1.53 |
| <i>A. boucheti</i> | <i>A. strummeri</i> | 1.41 | 145 360 | 14 251 | 22 573 | 34 770 | 26 695 | 3.15 | 2.77 | 139 300 | 49 780 | 3 220   | 6 120 | 0.04 |         | 0.39 |      |      | 1.27 |      |      |
| <i>A. boucheti</i> | <i>A. strummeri</i> | 1.26 | 167 780 | 17 548 | 21 056 | 83 455 | 21 185 | 2.84 | 1.93 | 108 140 | 360    | 5 760   | 3 200 | 0.03 |         | 0.72 | 3.67 | 1.92 | 2.19 | 4.01 | 4.51 |

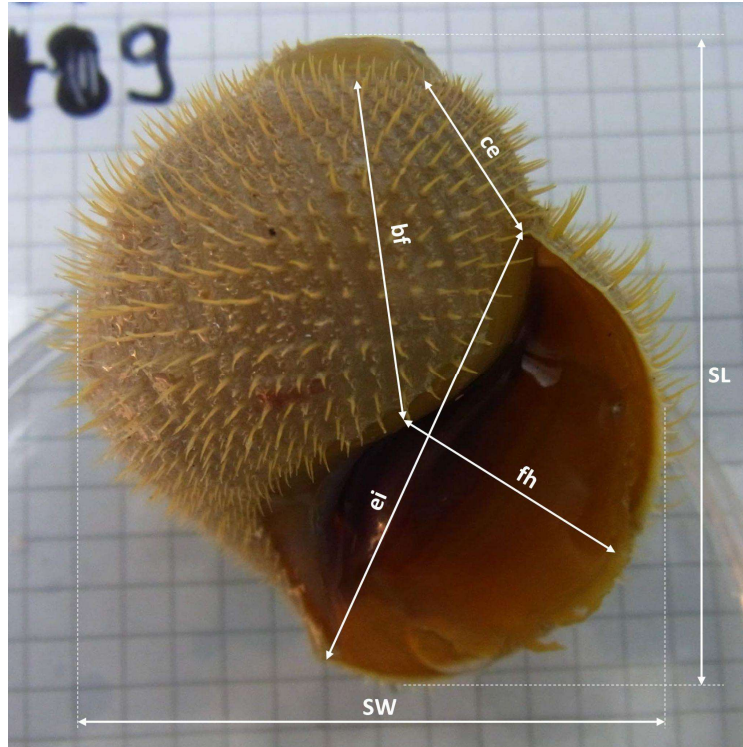

**Figure S1.** Shell traits measured with a calliper on *Alviniconcha* individuals during the Chubacarc expedition from Chiu et al. [40]. SL: total length, SW: total width, ei and fh: length and width of the aperture, ce and bf: spires lengths.

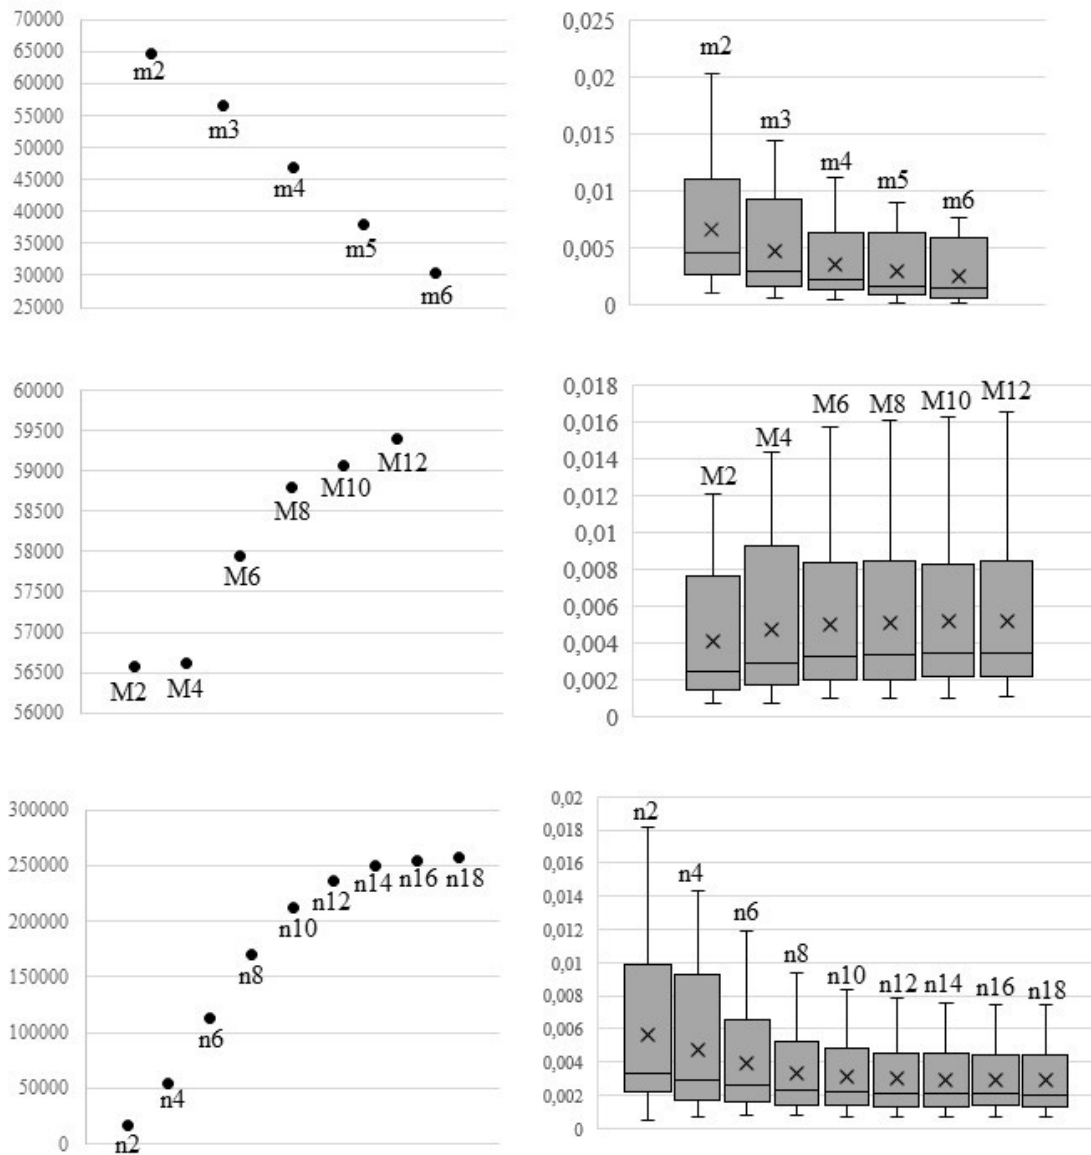

**Figure S2.** Number of conserved SNPs and error rate as a function of  $n$ ,  $m$  and  $M$  in Stacks.

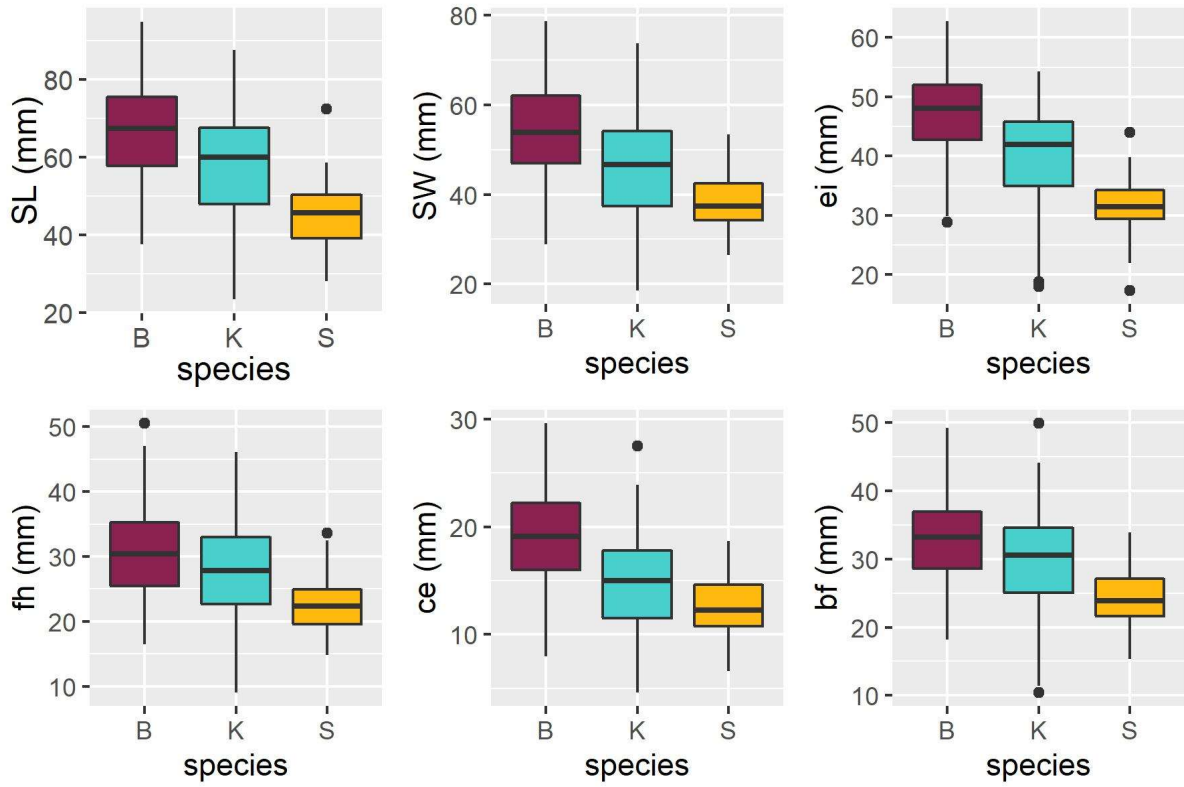

**Figure S3.** Distribution of six morphometric variables measured in *Alviniconcha boucheti* (purple,  $n=247$  ind.), *A. kojimai* (turquoise,  $n=409$ ), and *A. strummeri* (orange,  $n=44$ ). SL: total length, SW: total width, ei and fh: length and width of the aperture, ce and bf: spires lengths.

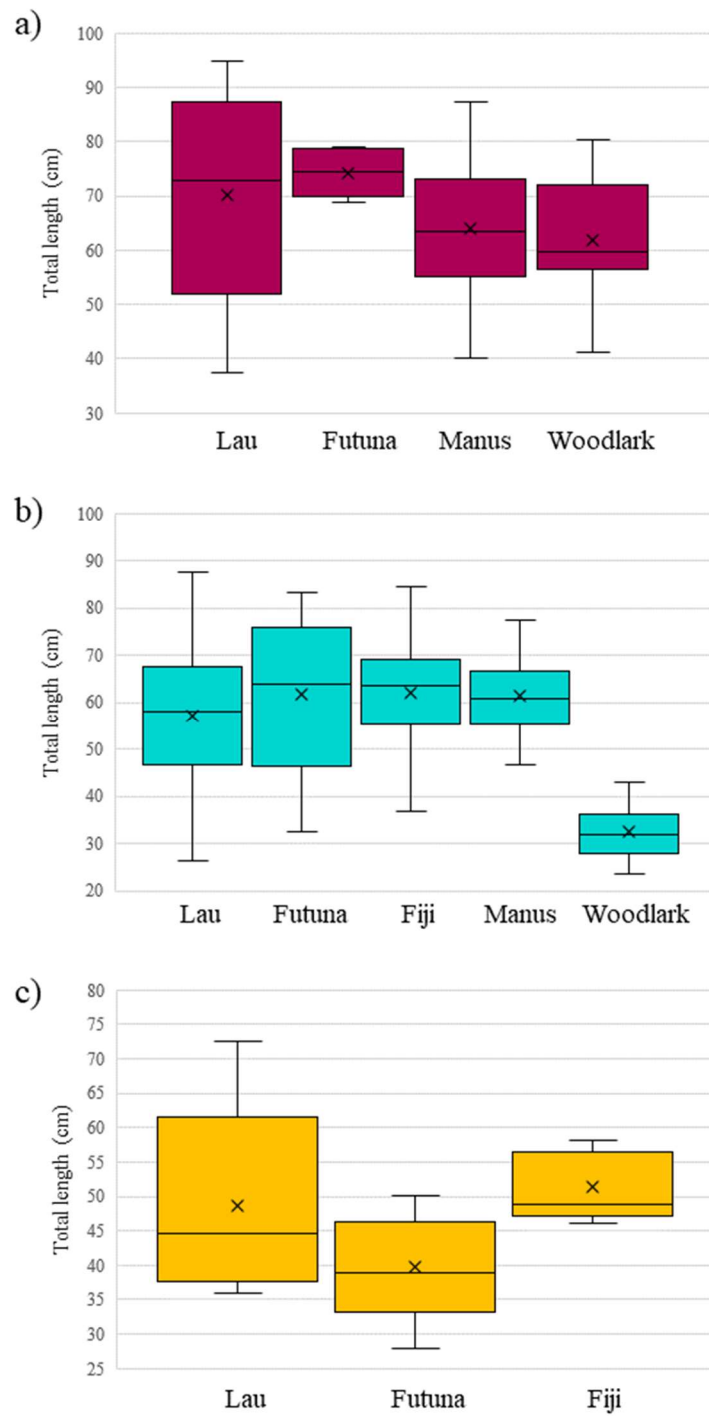

**Figure S4.** Distribution of the total length (SL) as a function of sampling basin in *Alviniconcha boucheti* (purple,  $n=247$  ind.), *A. kojimai* (turquoise,  $n=409$ ), and *A. strummeri* (orange,  $n=44$ ).



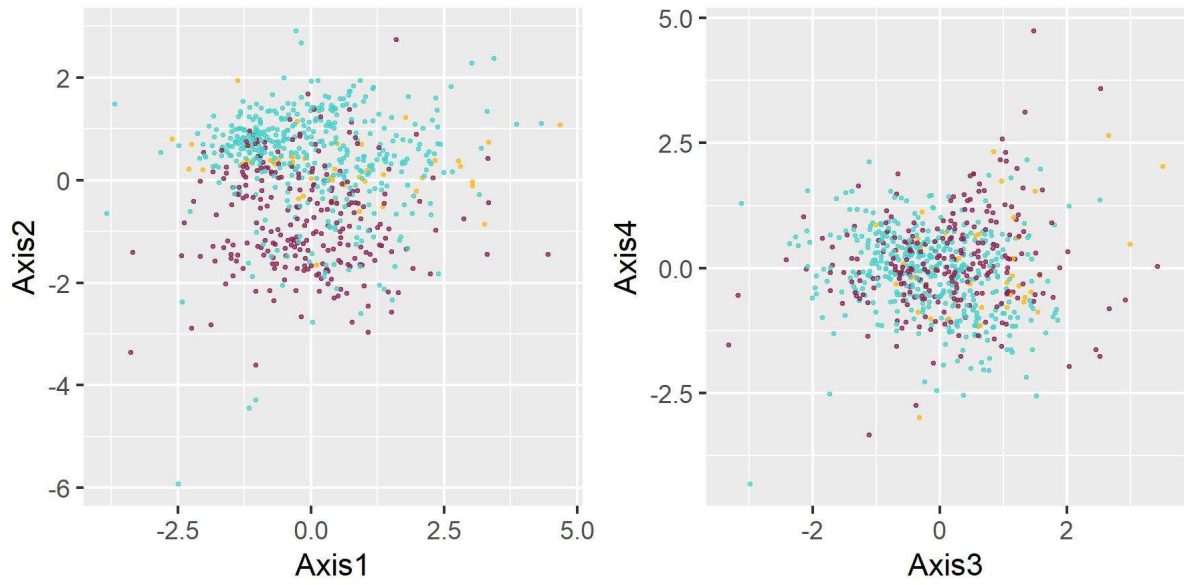

**Figure S5.** Principal component analysis of five transformed morphometric variables (see text) for *Alviniconcha boucheti* (purple,  $n=247$  ind.), *A. kojimai* (turquoise,  $n=409$ ), and *A. strummeri* (orange,  $n=44$ ). The first four components shown here explain 31.2%, 25.4%, 18.1%, and 16.5% of the variance, respectively. The second principal component seems to be linked mildly with species identity.

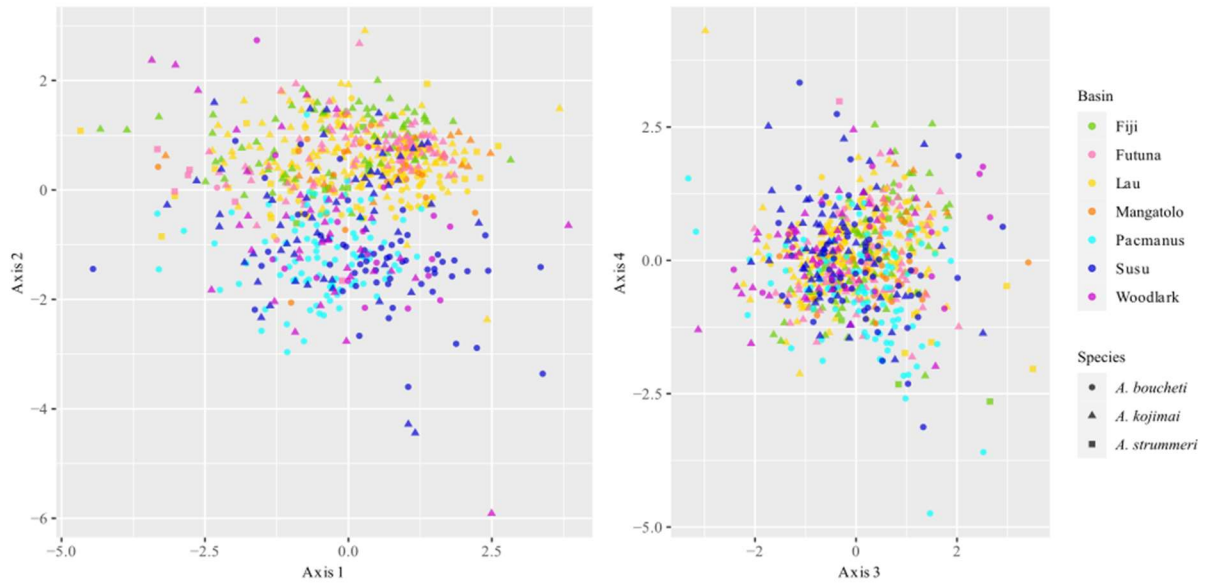

**Figure S6.** Principal component analysis of five transformed morphometric variables (see text) for *Alviniconcha boucheti* (circle,  $n=247$  ind.), *A. kojimai* (triangle,  $n=409$ ), and *A. strummeri* (square,  $n=44$ ) according to the sampling basin (Fiji: green; Futuna: pink; Lau: yellow; Pacmanus: turquoise; Susu: blue and Woodlark: purple). The first four components shown here explain 31.2%, 25.4%, 18.1%, and 16.5% of the variance, respectively. The second principal component seems to be linked mildly with locality.

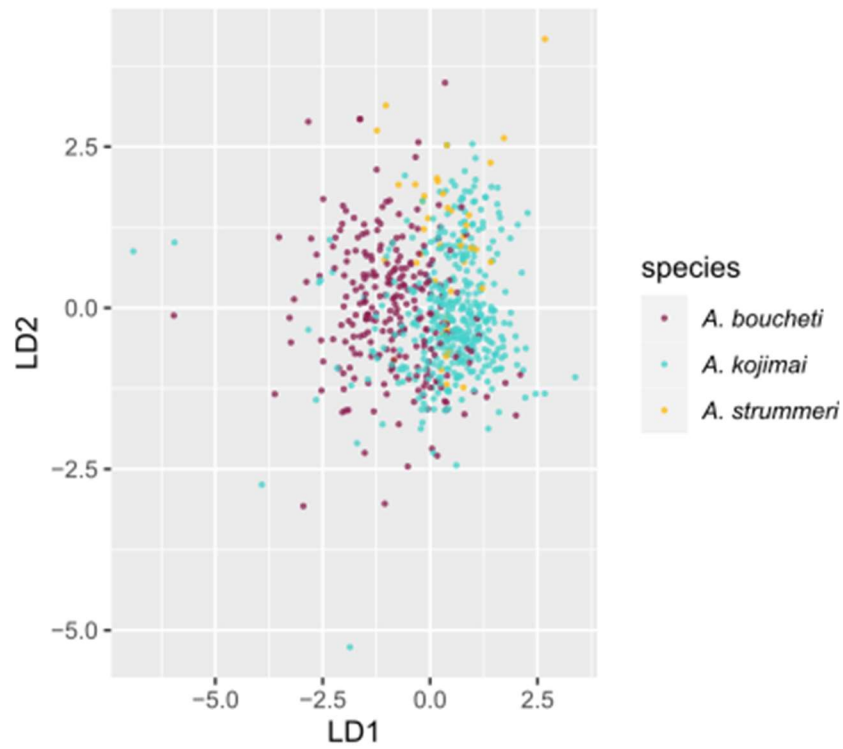

**Figure S7.** Linear discriminant analysis of species identity based on five transformed morphometric variables (see main text) for *Alviniconcha boucheti* (purple,  $n=247$  ind.), *A. kojimai* (turquoise,  $n=409$ ), and *A. strummeri* (orange,  $n=44$ ). The combination of linear discriminants only allows a partial reclassification of species (75%).

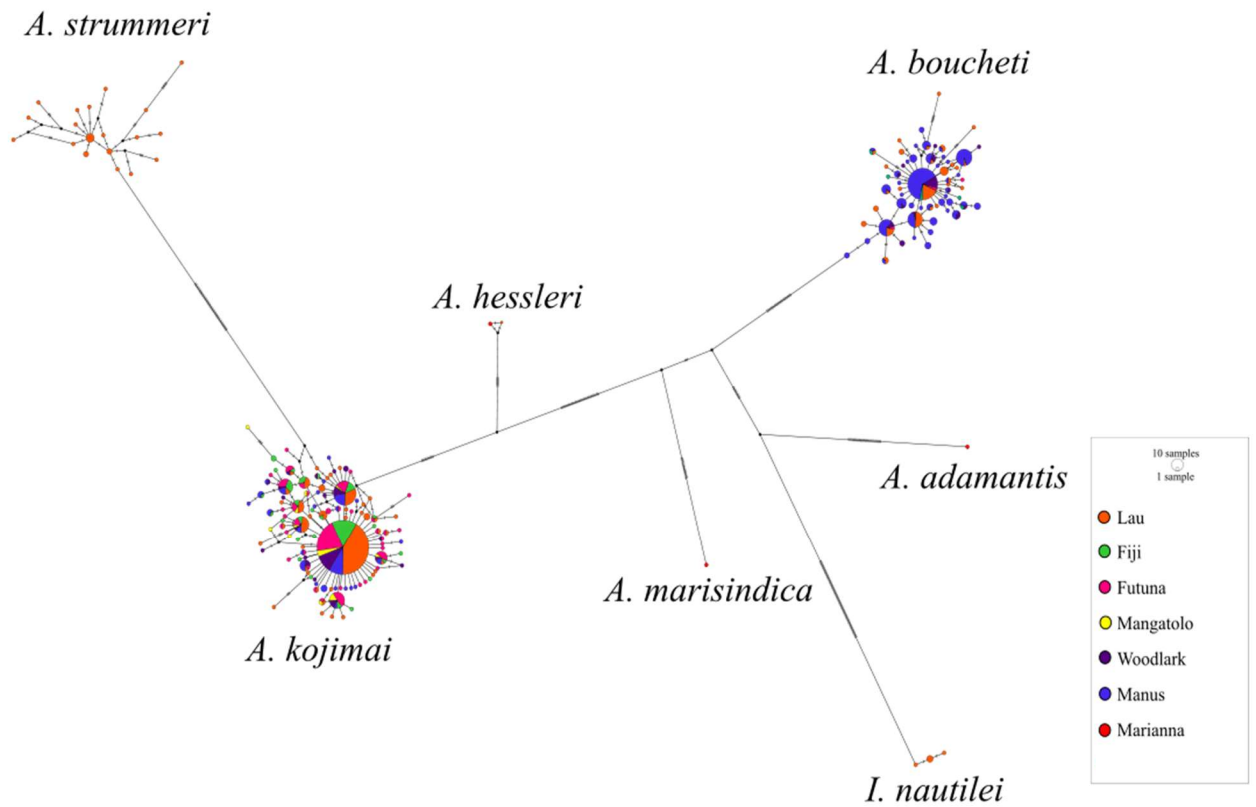

**Figure S8.** Haplotype network of 722 individuals of *Alviniconcha* spp for *Cox1* partial mitochondrial sequence rooted with *Ifremeria nautiliei* (n= 4). Circles represent individual haplotypes, while circle size is proportional to haplotype frequency. The traits on the branches indicate the number of mutations between haplotypes. Orange: Lau Basin; Green: North-Fiji Basin, Pink: volcanic zone of Futuna, Yellow: Mangatolo site, Purple: Woodlark Basin, Blue: Manus Basin and Red: Marianna Trench.

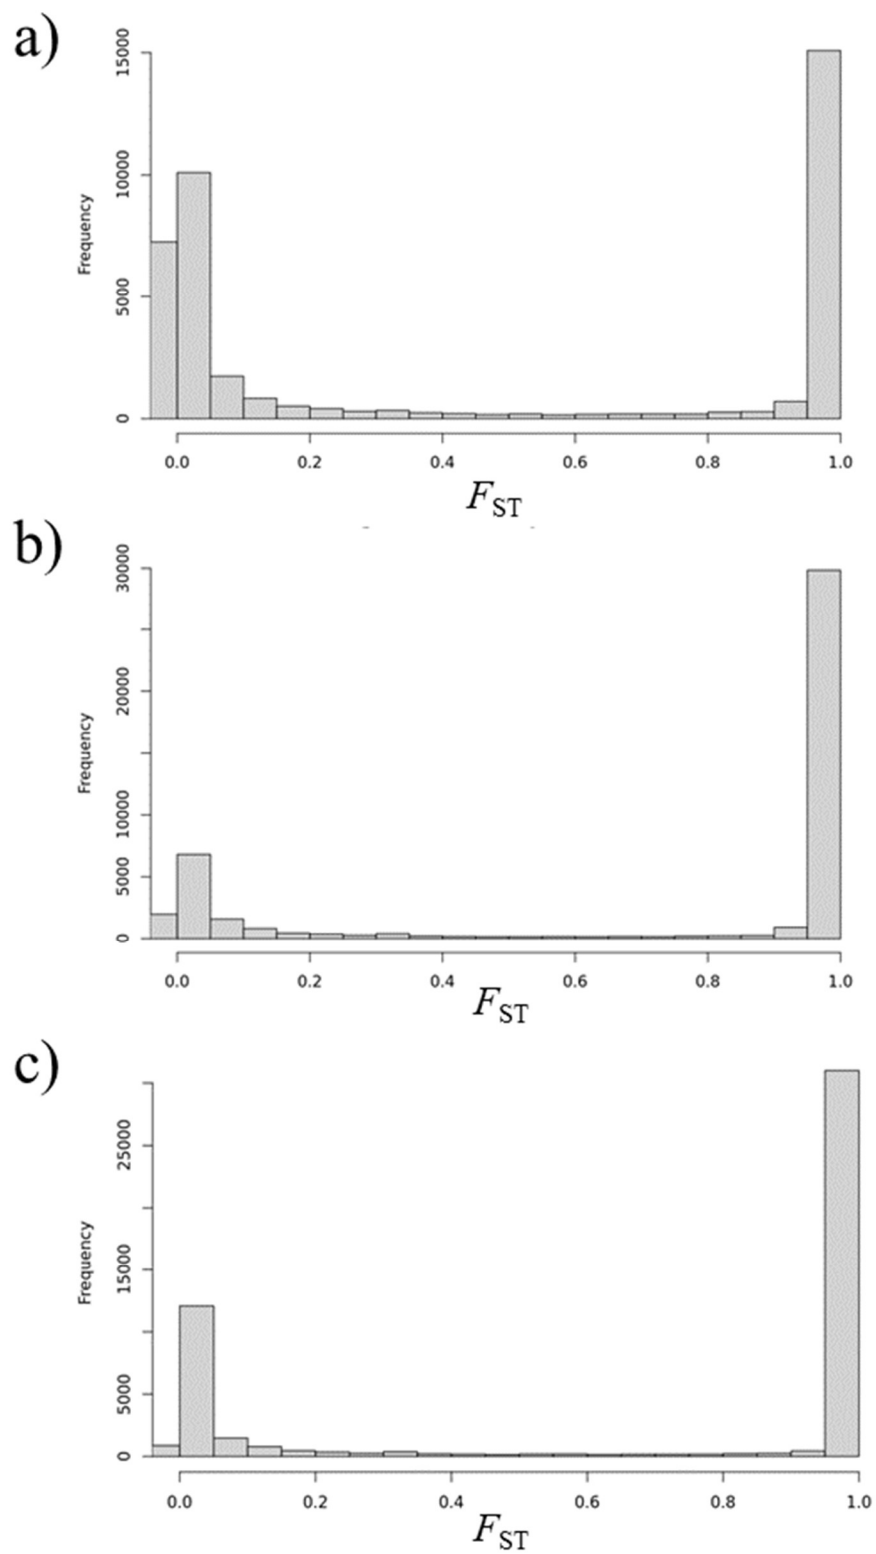

**Figure S9.** Distribution of  $F_{ST}$  values by species pair, a) *A. kojimai/A. strummeri* on 39 533 SNP, b) *A. boucheti/A. strummeri* on 45 514 SNP and c) *A. kojimai/A. boucheti* on 50 093 SNP.

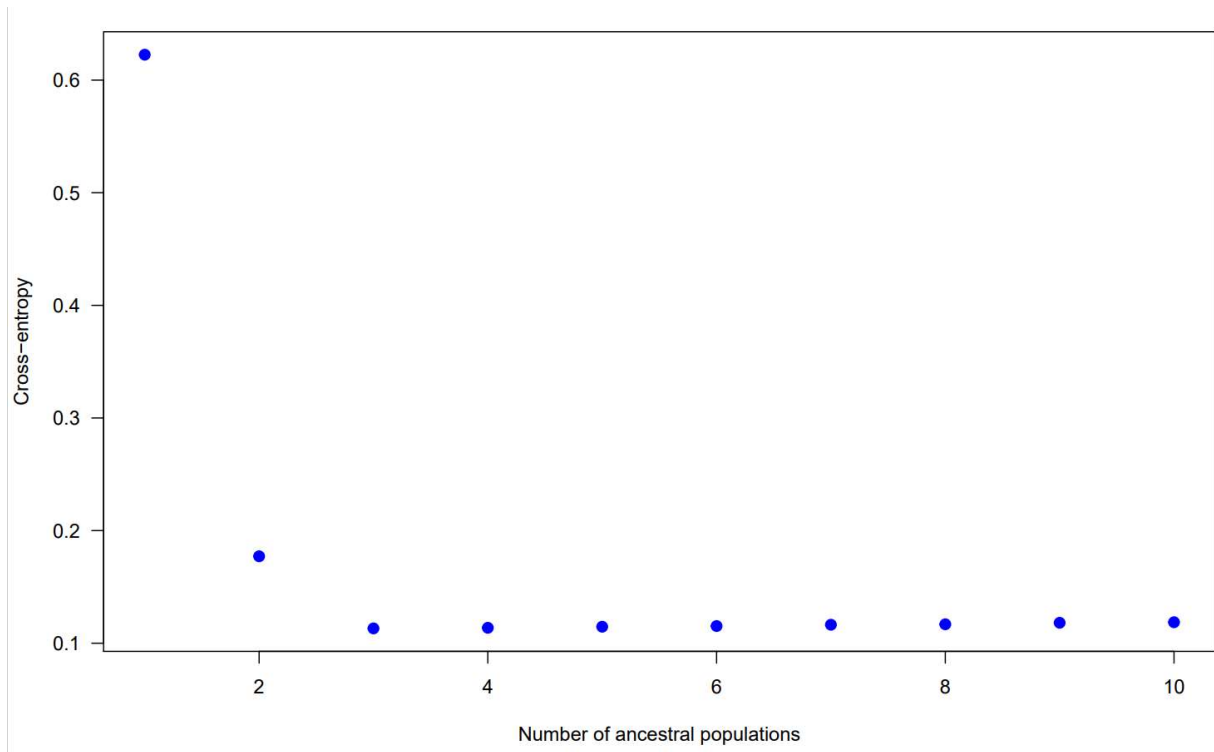

**Figure S10.** Values of the cross-entropy criterion as a function of the number of factors used in snmf runs.

Example of detailed parameter settings for *A. boucheti*/*A. kojimai* in DILS analysis:

infile: /beegfs/data/dils/8YVpfpJuxy/DILS\_fichier.fasta  
region: noncoding  
nspecies: 2  
nameA: boucheti  
nameB: kojimai  
nameOutgroup: NA  
useSFS: 1  
lightMode: FALSE  
config\_yaml: /beegfs/data/dils/8YVpfpJuxy/8YVpfpJuxy.yaml  
timeStamp: 8YVpfpJuxy  
population\_growth: variable  
modeBarrier: beta  
max\_N\_tolerated: 0.2  
Lmin: 144  
nMin: 12  
mu: 1e-08  
rho\_over\_theta: 0.1  
N\_min: 100  
N\_max: 1000000  
Tsplitted\_min: 100  
Tsplitted\_max: 1000000  
M\_min: 0.4  
M\_max: 20
